# Supplementary material
Source: PubMed Central journal article supplement (PMC6040670)
Supplement: NIHMS979273-supplement-BFaacdc7suppdata_pdf.pdf [file NIHMS979273-supplement-BFaacdc7suppdata_pdf.pdf]

## Supplementary Data

1  
2  
3 Further experimentation was conducted to determine if the ‘printability window’ ( $0.25 < \tan \delta <$   
4  $0.45$ ) found for gelatin-alginate formulations could be applied to other bioinks. Rheology,  
5 extrusion uniformity (Figure S1), and structural integrity (Figure S2) experiments were conducted  
6 on Pluronic F127, hyaluronic acid (HA), and a fibrinogen composite bioink using the same  
7 methodology as the gelatin-alginate formulations. Pluronic F127 was tested at 270 mg/mL and 400  
8 mg/mL, HA at 30 mg/mL, and the fibrinogen composite bioink contained 20 mg/mL fibrinogen,  
9 35 mg/mL gelatin, 3 mg/mL HA, and 10%(v/v) glycerol.

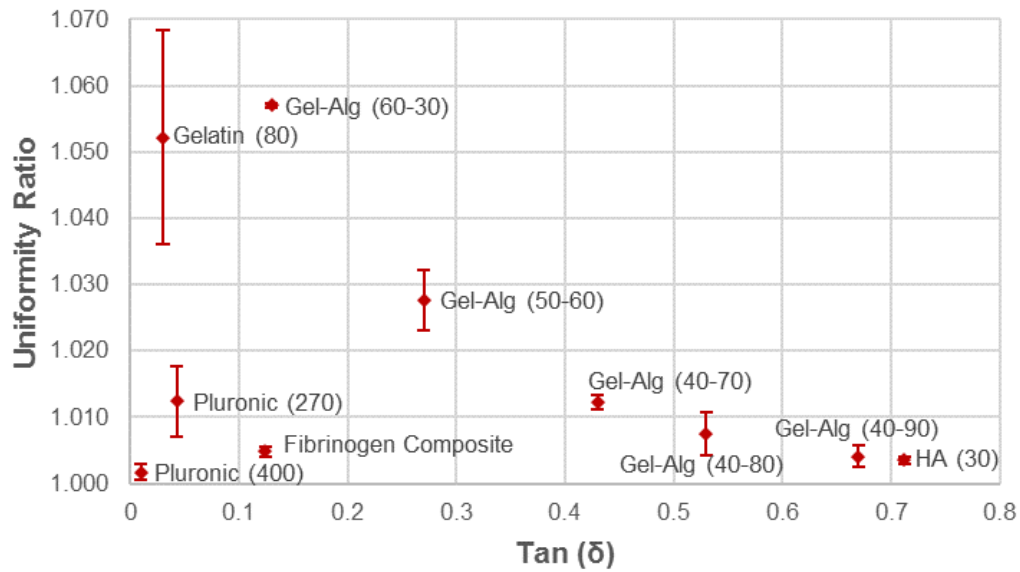

10  
11 **Figure S1.** Extrusion uniformity vs. loss tangent of various hydrogels.  
12

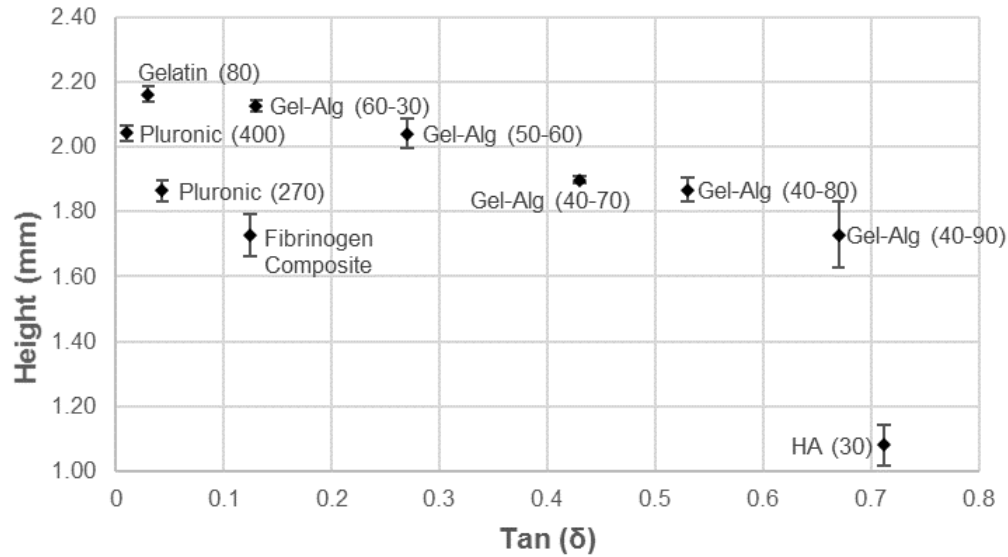

13

14

**Figure S2.** Structural integrity vs. loss tangent of various hydrogels.

15

16 3% HA followed similar trends to the gelatin-alginate formulations. Its high loss tangent resulted

17 in poor structural integrity and high extrusion uniformity. However, the fibrinogen composite

18 bioink also showed poor structural integrity and high extrusion uniformity despite a loss tangent

19 similar to the 80 mg/mL gelatin (0.12). Lastly, 400 mg/mL Pluronic F127 was highly printable

20 (excellent structural integrity and extrusion uniformity) despite a loss tangent that fell well outside

21 of the printable window for gelatin-alginate formulations. This data likely suggests that the

22 desirable loss tangent for any given bioink will be hydrogel-dependent.
